# Supplementary material for: A Theoretical Thermal Tolerance Function for Ectothermic Animals and Its Implications for Identifying Thermal Vulnerability across Large Geographic Scales
Source: MDPI journal article supplement (doi:10.3390/d15050680), 2023-05-19
Supplement: s1 [file s1]

Archive with 1 entries (1 files):
- diversity-2269534-supplementary.pdf
